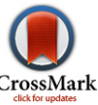

# The Quality of Methods Reporting in Parasitology Experiments

Oscar Flórez-Vargas<sup>1</sup>, Michael Bramhall<sup>1</sup>, Harry Noyes<sup>2</sup>, Sheena Cruickshank<sup>3</sup>, Robert Stevens<sup>1</sup>, Andy Brass<sup>1,3\*</sup>

**1** Bio-health Informatics Group, School of Computer Science, University of Manchester, Manchester, United Kingdom, **2** School of Biological Science, University of Liverpool, Liverpool, United Kingdom, **3** Manchester Immunology Group, Faculty of Life Science, University of Manchester, Manchester, United Kingdom

## Abstract

There is a growing concern both inside and outside the scientific community over the lack of reproducibility of experiments. The depth and detail of reported methods are critical to the reproducibility of findings, but also for making it possible to compare and integrate data from different studies. In this study, we evaluated in detail the methods reporting in a comprehensive set of trypanosomiasis experiments that should enable valid reproduction, integration and comparison of research findings. We evaluated a subset of other parasitic (*Leishmania*, *Toxoplasma*, *Plasmodium*, *Trichuris* and *Schistosoma*) and non-parasitic (*Mycobacterium*) experimental infections in order to compare the quality of method reporting more generally. A systematic review using PubMed (2000–2012) of all publications describing gene expression in cells and animals infected with *Trypanosoma spp* was undertaken based on PRISMA guidelines; 23 papers were identified and included. We defined a checklist of essential parameters that should be reported and have scored the number of those parameters that are reported for each publication. Bibliometric parameters (impact factor, citations and h-index) were used to look for association between Journal and Author status and the quality of method reporting. Trichuriasis experiments achieved the highest scores and included the only paper to score 100% in all criteria. The mean of scores achieved by *Trypanosoma* articles through the checklist was 65.5% (range 32–90%). Bibliometric parameters were not correlated with the quality of method reporting (Spearman's rank correlation coefficient  $< -0.5$ ;  $p > 0.05$ ). Our results indicate that the quality of methods reporting in experimental parasitology is a cause for concern and it has not improved over time, despite there being evidence that most of the assessed parameters do influence the results. We propose that our set of parameters be used as guidelines to improve the quality of the reporting of experimental infection models as a pre-requisite for integrating and comparing sets of data.

**Citation:** Flórez-Vargas O, Bramhall M, Noyes H, Cruickshank S, Stevens R, et al. (2014) The Quality of Methods Reporting in Parasitology Experiments. PLoS ONE 9(7): e101131. doi:10.1371/journal.pone.0101131

**Editor:** Sylvie Bisser, INSERM U1094, University of Limoges School of Medicine, France

**Received:** January 17, 2014; **Accepted:** June 3, 2014; **Published:** July 30, 2014

**Copyright:** © 2014 Flórez-Vargas et al. This is an open-access article distributed under the terms of the Creative Commons Attribution License, which permits unrestricted use, distribution, and reproduction in any medium, provided the original author and source are credited.

**Funding:** This research is supported by a scholarship 'Francisco José de Caldas' from Colciencias to Oscar Flórez-Vargas and a co-funding scholarship from EPSRC and Epistem Ltd awarded to Michael Bramhall. The funders had no role in study design, data collection and analysis, decision to publish, or preparation of the manuscript.

**Competing Interests:** This manuscript has not been published and is not under consideration for publication elsewhere. This research was supported by a scholarship 'Francisco José de Caldas' from Colciencias to Oscar Flórez-Vargas and a co-funding scholarship from EPSRC and Epistem Ltd awarded to Michael Bramhall. This does not alter the authors' adherence to PLOS ONE policies on sharing data and materials.

\* Email: andy.brass@manchester.ac.uk

## Introduction

In this study, we evaluated the reported information on experimental methods in published infectious disease experiments that should enable a valid comparison of research findings. It has been claimed that most published research findings are false [1] and concern about this is spreading beyond the scientific community, making the cover of *The Economist* recently [2], and potentially undermining public trust in science. Amongst the scientific community there is a growing concern over the related problem of lack of reproducibility [3,4]. The depth and detail of reported methods directly contributes to the replicability, reproducibility and comparability of experimental work. Replicability is the exact repetition of an experiment to obtain the same results, reproducibility is the repetition of an experiment with small modifications, e.g. the changes that will inevitably occur when conducting the same experiment in different laboratories [5,6]. If results are replicable but not reproducible they may be of little

value since they are likely to be idiosyncratic to the precise conditions used and further inference from the results will be problematic. Comparability is essential to facilitate translational discoveries by making it possible to aggregate data from multiple experiments in a single meta-analysis and answering questions not addressed by the original investigators. The information reported in the Materials & Methods section of an article plays a fundamental role in achieving this aim. In the biomedical field, for instance, the Uniform Guidelines of the International Committee of Medical Journal Editors state that authors should include technical information in sufficient detail to allow the experiment to be repeated by other workers [7]. However, the guidelines are not strictly adhered to and, consequently, the lack of methodological information can make the tasks of replicating, reproducing or comparing results by non-specialists in a field problematic.

Over the past decade sets of minimum items of information have been published that should be reported about a dataset or an

experimental process [8]. This allows readers not only to unambiguously interpret and critically evaluate the conclusions reached, but also to potentially replicate, reproduce and compare the experiments. The minimum information checklist or guidelines seek to promote transparency in experimental reporting, enhance accessibility to data and support effective quality assessment, which increases the general value of data, and therefore of the scientific evidence. In this sense, some standard initiatives, such as the Minimum Information About a Microarray Experiment (MIAME) [9] and the Minimum Information About a Proteomics Experiment (MIAPE) [10], have been adopted by several journals, such as Nature Genetics or the Journal of Proteomics, as a requirement for publication.

To address the issue of reproducibility in the context of biomedical experiments, we looked at experimental infection models with a particular focus on the trypanosomiasis, which are a widespread group of complex infectious diseases caused by flagellated protozoa of the genus *Trypanosoma*. These infections affect humans and animals, often with fatal consequences unless treated. In humans, African (sleeping sickness) and American (Chagas disease) trypanosomiasis are responsible for considerable morbidity and mortality, affecting millions of people every year [11–13]. Moreover, human economic welfare in Africa is also affected by these diseases due to loss of livestock production [14]. The outcome of infection with both American and African trypanosomes depends on both the host and parasite genetic background as well as on environmental variation [15–17]. In addition, the trypanosomiasis have been labelled as “neglected” because their study hovers in the margins of international health; there is a smaller investment in their research and development and as a result they are less well understood. Hence, an important task is to integrate and compare data from their studies in order to augment the value of this data.

Many studies have been carried out to explore the physiopathology of sleeping sickness and Chagas disease, as well as their genetics. At the time of writing, a PubMed search from 2000–2013 retrieved 1558 and 4248 journal articles containing the MeSH (Medical Subject Headings) terms “Trypanosomiasis, African” and “Chagas disease”, respectively. Despite the large amount of published research, our understanding of the underlying mechanisms involved in these diseases is still limited. It is likely that this can be partly explained by the inherent difficulty in making direct comparisons between the results of independent *Trypanosoma* infection experiments.

Currently we have data from studies carried out in experimental models of trypanosomiasis. However, a considerable part of this evidence is controversial or contradictory; probably stemming from differences in pre-analytical, analytical and post-analytical variables, as well as experimental design and data analysis. In Chagas diseases, for instance, the role played by the Th17 immune response, T regulatory cells and Nitric Oxide may be critical to the outcome of infection [18–20] or these immune factors may have opposing effects or not be required [21–23]. Therefore, it is important to know how the data were produced in order to deal not only with the biological complexity of these diseases, but also to permit the replicability, reproducibility and, especially in the case of contradictory results, the comparability of research findings. In order to assess how easy it would be to replicate, reproduce or compare experiments we have undertaken a systematic review of all publications describing gene expression experiments in model organisms infected with these parasites. We have defined a list of essential parameters describing the parasite, the host and the infection that should be reported and for each experiment we have scored the number of those parameters that

are reported. In order to determine whether our findings can be generalised to other diseases we have used the same method to assess a subset of papers on *Leishmania*, *Toxoplasma* and *Plasmodium*. A subset of papers that utilised the intestinal helminth parasite *Trichuris muris* or *Schistosoma sp.* were used as a comparative control in order to determine the relevance of the checklist in a non-protozoan parasite infection model. In addition, a subset of papers from a non-parasitic infection model (*Mycobacterium*) were used in order to determine whether this issue is unique to parasitology or has wider implications.

## Results

### Search strategy

A total of 23 papers on *Trypanosoma* experiments were identified for inclusion in the review. The search in PubMed provided a total of 5878 references with the MeSH term “Trypanosomiasis”, of which 104 were related with terms “Genes” and “Proteins”, 35 with “Microarray Analysis”, and 27 with “Proteomics”. After adjusting for duplicates 163 remained. The abstracts of these papers were reviewed manually and 139 were discarded because they did not meet the selection criteria (Figure 1 and Table 1). The remaining 23 references [24–46] were the corpus of papers identified that reported on gene expression profiling in the host due to an experimental *Trypanosoma* infection. A subset of 10 articles each of the closely related protozoan parasites *Leishmania* [47–56], *Toxoplasma* [57–66] and *Plasmodium* [67–76] were included for comparison. In addition, 10 articles of *Trichuris* [77–86] and *Schistosoma* [87–96] parasitic worm experiments, and 10 articles of *Mycobacterium* [97–106] experiments as a non-parasitic infection model were included in order to contrast the quality of method reporting in *Trypanosoma* experiments to other models and to determine the applicability of the checklist to different experimental systems.

### Quality of method reporting

To assess the quality of method reporting in *Trypanosoma* experiments, each paper was checked for reporting of information in three domains: the parasite, the host and the experimental infection. The scores are listed in Tables S1, S2 and S3. A mean of 65.5% (SD = 15.12%) of the information required to reproduce an experiment was reported in this set of papers. No article met all criteria that should be reported in a *Trypanosoma* experiment according to our checklist (range 32–90%), although two studies [27,41] scored at 100% out of the available criteria for the parasite and host domains (Tables S1 and S2). The number of articles that met all criteria was higher in the parasite domain (6 out of 23 articles), however the number of criteria met by all the articles was higher in the host domain (7 out of 12 criteria) (Figure 2, Tables S1, S2 and S3). In the experimental infection domain, the inoculum was the only criteria met by all articles, whereas the viability criteria for both cells and parasites were not met in full by any of the studies (Table S3).

### Bibliometric indices

Different journals have different criteria for publication in order to enhance the quality of research and to prevent publication of poor findings. However, these safeguards are not always successful; limited space for the method section or forms of bias in the peer review process are some of the issues that have generated serious discussion in several scientific journals [107]. Thus, to discover whether there was an association between bibliometric parameters and the quality of method reporting in *Trypanosoma* experiments, the journal impact factor, the h-index of the corresponding author

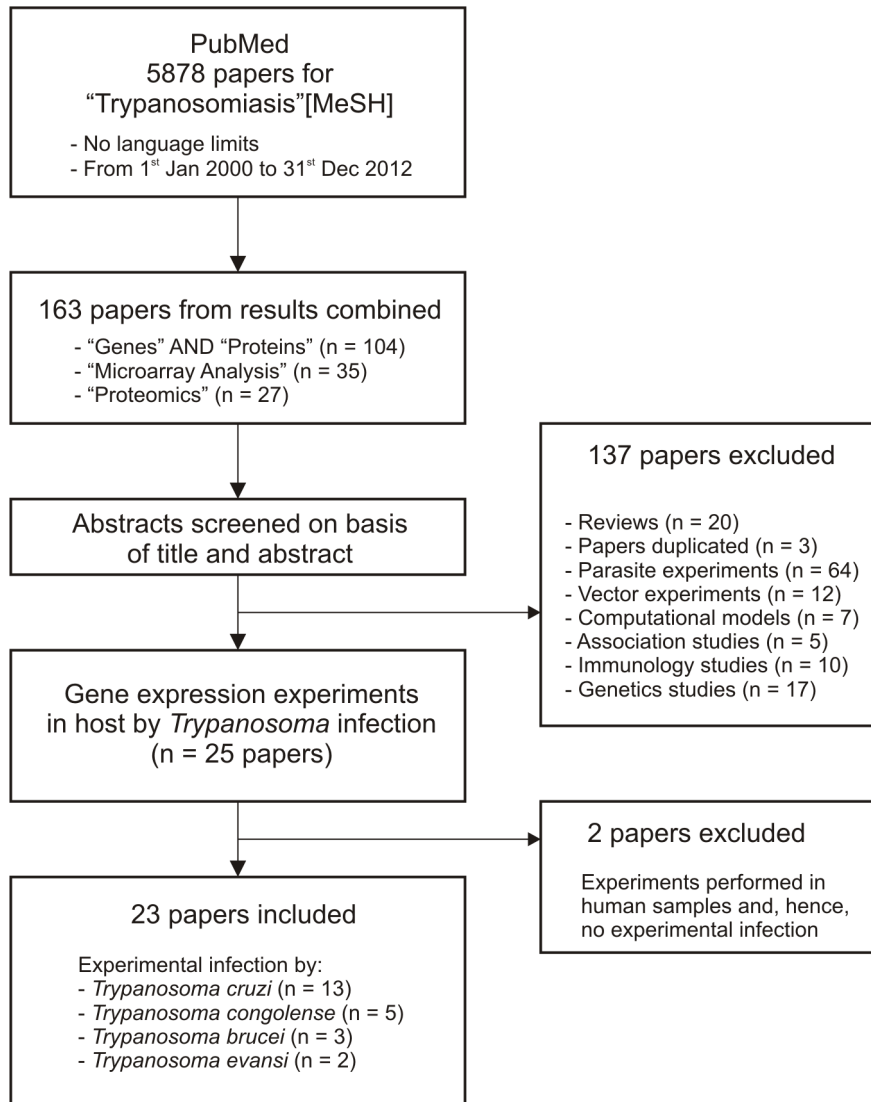

**Figure 1. Study selection process for *Trypanosoma* studies.**  
doi:10.1371/journal.pone.0101131.g001

and the number of citations of the article were compared with the scores for the quality of method reporting. No correlation was observed between method reporting scores and impact factor or h-index (Figures 3A and 3B). However, a significant negative correlation was observed when the scores for method reporting were correlated with the number of citations of the article obtained from Google Scholar ( $r = -0.42$ ;  $p = 0.044$ ,  $n = 23$ ) but not with citations from the Web of Sciences ( $r = -0.35$ ;  $p = 0.105$ ,  $n = 23$ ) (Figure 3C). Interpretation of this observation is confounded by the tendency of older papers to have more citations (Google Scholar:  $r = -0.40$ ;  $p = 0.057$ ,  $n = 23$ ; Web of Sciences:  $r = -0.42$ ;  $p = 0.046$ ,  $n = 23$ ; Figure 3D). There was no correlation between the quality of method reporting and the year of publication, which remained constant during the last 12 years (Figure 4).

In order to identify relations between the quality of methods reporting in *Trypanosoma* experiments and the experience of the journal with publishing papers about trypanosomiasis, we compared the scores achieved for the articles (arithmetic mean was calculated for two or more papers) with the number of articles about trypanosomiasis in the journal in which the articles were

published. This comparison showed that the number of articles published in any one journal about trypanosomiasis was not associated with an increase in the quality of methods reporting. The journals with most and fewest articles published about trypanosomiasis between 2000 and 2012 were the American Journal of Tropical Medicine and Hygiene with 172 papers and Genes and Immunity with only three papers (Table S4). Nonetheless, the article that received the lowest score in the reported information (32%) was published in the American Journal of Tropical Medicine and Hygiene [40], whereas the mean score for articles published in Genes and Immunity [36] was almost double this value (60%) (Figure 5).

#### Comparison with other parasitic diseases

In order to test whether our observations about the quality of method reporting were a general phenomenon or whether they were specific to trypanosomiasis we evaluated 10 articles each on *Leishmania*, *Toxoplasma* and *Plasmodium*; these diseases were chosen because they are also complex and considered public health issues. As in the articles about *Trypanosoma* experiments,

**Table 1.** Studies characteristics in trypanosomiasis: parasite species, experimental infection models and aims of the studies.

| Author, year and journal                   | Parasite                 | Infection model                      | Aim                                                                                                                                                                                                                                                          |
|--------------------------------------------|--------------------------|--------------------------------------|--------------------------------------------------------------------------------------------------------------------------------------------------------------------------------------------------------------------------------------------------------------|
| Amin et al., 2010 Am J Trop Med Hyg        | <i>T. b. brucei</i>      | Mouse                                | Discover genes differentially expressed in brain of mice at the early and late stages of <i>T. b. brucei</i> infection.                                                                                                                                      |
| Chessler et al., 2009 J Immunol            | <i>T. cruzi</i>          | Mouse                                | Examine the initial host-parasite interaction in vivo by monitoring changes in global host mRNA levels at the site of intradermal infection of mice with <i>T. cruzi</i> .                                                                                   |
| Costales et al., 2009 BMC Genomics         | <i>T. cruzi</i>          | Cell line                            | Investigate the impact of intracellular <i>T. cruzi</i> infection on host cell gene expression.                                                                                                                                                              |
| Garg et al., 2004 Biochem J                | <i>T. cruzi</i>          | Mouse                                | Characterise the cardiac metabolic response to <i>T. cruzi</i> infection and progressive disease severity.                                                                                                                                                   |
| Genovesio et al., 2011 PLoS One            | <i>T. cruzi</i>          | Cell line                            | Search for human cell factors that play a role during infection by the protozoan parasite <i>T. cruzi</i> .                                                                                                                                                  |
| Goldenberg et al., 2009 Microbes Infect    | <i>T. cruzi</i>          | Primary culture (Cardiomyocytes)     | Examine gene profiling of <i>T. cruzi</i> -infected cardiac myocytes.                                                                                                                                                                                        |
| Graefe et al., 2006 PLoS One               | <i>T. cruzi</i>          | Mouse                                | Analyse genome wide expression differences in the spleen at the point at which the immune response diverges between susceptible and resistant mice, and then match the genomic localisation of differential expressed genes with mapped susceptibility loci. |
| Hashimoto et al., 2005 Int J Parasitol     | <i>T. cruzi</i>          | Cell line                            | Report the time-course of transcriptional changes in apoptosis-related genes responsive to Fas stimulation in <i>T. cruzi</i> infected cells.                                                                                                                |
| Hill et al., 2005 Vet Immunol Immunopathol | <i>T. congolense</i>     | Cattle                               | Investigate the transcriptional response of susceptible cattle to trypanosome infection.                                                                                                                                                                     |
| Kierstein et al., 2006 Genes Immun         | <i>T. congolense</i>     | Mouse                                | Explore the ability of more integrated analysis of genetics of trypanotolerance underlying the response to infection and identify pathways involved in trypanotolerance.                                                                                     |
| Li et al., 2009 Parasitol Res              | <i>T. evansi</i>         | Mouse                                | Investigate the global gene expression in the liver and spleen of mice after infection with <i>T. evansi</i> .                                                                                                                                               |
| Li et al., 2011 Exp Parasitol              | <i>T. b. brucei</i>      | Mouse                                | Examine the effects of <i>T. b. brucei</i> infection on the liver and spleen of mice at the molecular level.                                                                                                                                                 |
| Lopez et al., 2008 J Immunol               | <i>T. b. rhodesiense</i> | Mouse, primary culture and cell line | Define the spectrum of host innate immune response genes that are induced during early trypanosome infection in macrophages <i>ex vivo</i> as well as macrophages treated <i>in vitro</i> with sVSG.                                                         |
| Manque et al., 2011 Infect Immun           | <i>T. cruzi</i>          | Primary culture (Cardiomyocytes)     | Characterise the global response of murine cardiomyocytes after infection by trypomastigotes in a carefully controlled progression.                                                                                                                          |
| Meade et al., 2009 Mol Immunol             | <i>T. congolense</i>     | Cattle                               | Determine the expression levels of AMP and APP genes in PBMC isolated from trypanotolerant and trypanosusceptible cattle experimentally infected with <i>T. congolense</i> .                                                                                 |
| Mekata et al., 2012 Parasite Immunol       | <i>T. evansi</i>         | Mouse                                | Determine what kinds of inflammatory molecules play roles in the pathogenicity of <i>T. evansi</i> infection.                                                                                                                                                |
| Mukherjee et al., 2003 Parasitol Res       | <i>T. cruzi</i>          | Mouse                                | Identify genes that could contribute to cardiac remodelling as a result of <i>T. cruzi</i> infection.                                                                                                                                                        |
| Mukherjee et al., 2008 Genomics            | <i>T. cruzi</i>          | Mouse                                | Report the patterns of gene expression during the development of murine chagasic heart disease, encompassing several time points in the transition from acute to chronic disease.                                                                            |
| Noyes et al., 2009 PLoS One                | <i>T. congolense</i>     | Mouse                                | Assess the parameters that influence anaemia in murine <i>T. congolense</i> infections using mouse strains that differ in their susceptibility to trypanosomiasis.                                                                                           |
| O'Gorman et al., 2009 BMC Genomics         | <i>T. congolense</i>     | Cattle                               | Catalogue and analyse gene expression changes in PBMC from trypanotolerant and trypanosusceptible cattle following an experimental challenge with <i>T. congolense</i> .                                                                                     |
| Soares et al., 2010 J Infect Dis           | <i>T. cruzi</i>          | Mouse                                | Determine alterations in gene expression in the myocardium of mice chronically infected with <i>T. cruzi</i> .                                                                                                                                               |
| Soares et al., 2011 Cell Cycle             | <i>T. cruzi</i>          | Mouse                                | Evaluate the efficacy of transplantation of BMC to restore the normal transcriptome in the myocardium of mice chronically infected with <i>T. cruzi</i> .                                                                                                    |
| Tanowitz et al., 2011 Cell Cycle           | <i>T. cruzi</i>          | Primary culture (Endothelial cells)  | Determine the potential molecular mechanisms by which the parasite-derived TXA <sub>2</sub> modulates Chagas disease progression and limits collateral damage to organs.                                                                                     |

doi:10.1371/journal.pone.0101131.t001

no article about *Leishmania*, *Toxoplasma* and *Plasmodium* experiments met all criteria that should be reported on our checklist, although one publication on *Leishmania* [49] scored

100% for the parasite and host domains (Table S5 and S6). There was no significant difference in the percentage of reported information between *Trypanosoma*, *Leishmania*, *Toxoplasma* and

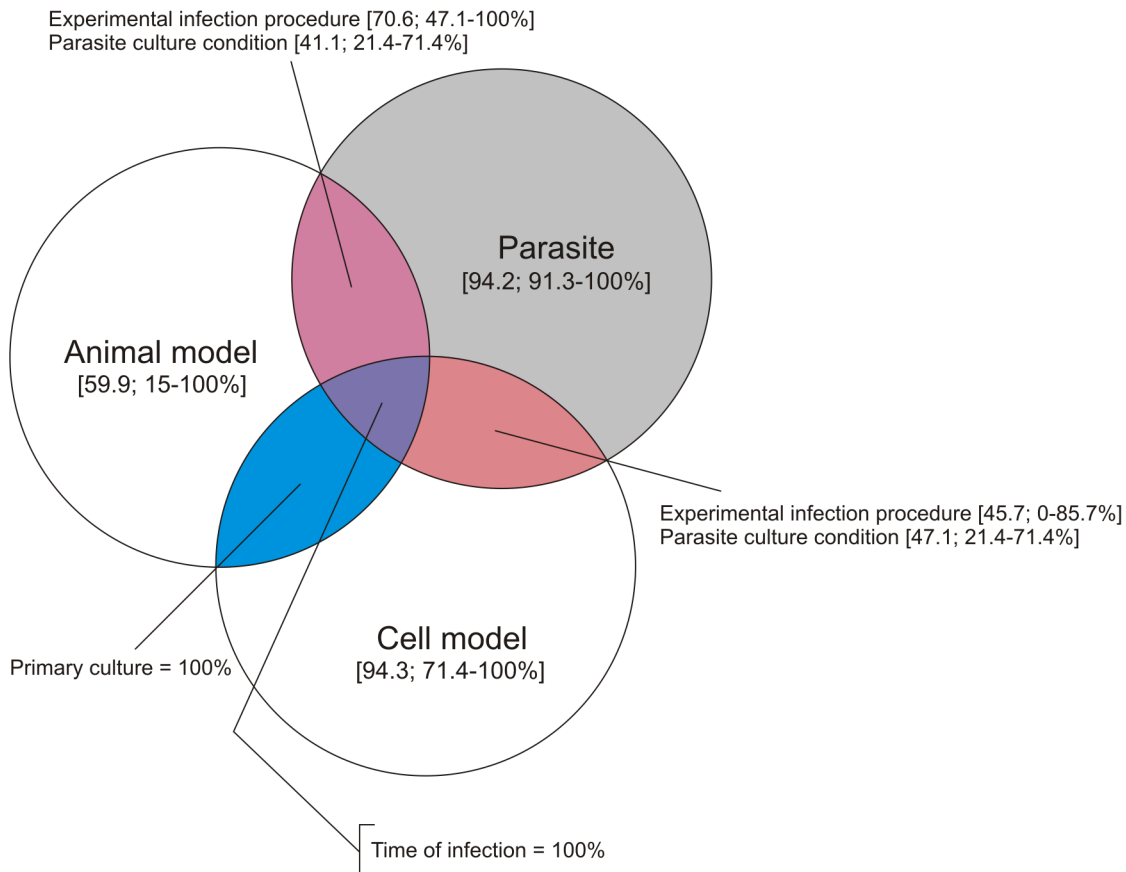

**Figure 2. Venn diagram summarising the quality of methods reporting in the three domains of *Trypanosoma* experiments.** The average and range of percentages scored of the quality of methods reporting is shown in brackets.  
doi:10.1371/journal.pone.0101131.g002

*Plasmodium* experiments (Figure 6). The lowest scores were found in the host domain in *Leishmania* and *Toxoplasma* experiments (20%, Table S5). *Plasmodium* experiments had the lowest score in the parasite domain (25%, Table S6) and *Leishmania* had the lowest score in the experimental infection domain (30%, Table S7). No *Toxoplasma* or *Plasmodium* experiment met all of the criteria in any domain (Table S5, S6 and S7).

In contrast to all protozoan parasite experiments, the quality of method reporting in the helminth model of infection by *Trichuris muris* showed the highest scores in all three domains (Figure 6). One *Trichuris muris* experiment [83] successfully scored 100% in all three domains. *Trichuris muris* experiments reported significantly more information than *Trypanosoma* ( $p < 0.001$ ), *Plasmodium* ( $p < 0.001$ ), *Schistosoma* ( $p < 0.001$ ), *Leishmania* ( $p < 0.01$ ) and *Toxoplasma* ( $p < 0.01$ ) experiments (Figure 6). However, the other helminth model, *Schistosoma sp.*, scored poorly with the second lowest mean reported information (61.16%). *Mycobacterium* (mean reported information 73.96%), the non-parasitic bacterial infection model, scored more highly than *Trypanosoma* (mean reported information 65.46%) but this was not significant.

### Validation of scoring methods

The papers from *Trypanosoma* experiments were initially scored by the first and second authors. A specialist in trypanosomiasis then independently scored these papers. The evaluation made by the trypanosomiasis specialist scored 61.6% for the number of criteria from the checklist met in the corpus of articles, whereas a

strict evaluation scored 65%. These evaluations scored 63.8% and 64.9% respectively after reviewing the results of both examinations. A linear correlation test (Figure 7A) showed a strong and significant linear correlation between the scores ( $r^2 = 0.96$ ;  $p < 0.0001$ ); suggesting that the checklist items measure a common domain and that the personal opinion of the coder does not have an important impact on the scores. In addition, a Bland-Altman test (Figure 7B) was used to verify the agreement between the two evaluations. This analysis showed a good concordance as 16 points were on the line of no difference and 21 fell within the 95% limits of agreement (mean = 0.80 and SD:  $\pm 2.91$ ), verifying that the scoring was consistent between the evaluators.

### Discussion

In order to draw conclusions about the quality of method information reported in articles and its impact on the replicability, reproducibility and comparability of experimental work, we have selected trypanosome infection models as a focus of study. Trypanosomiasis as a complex disease is an appropriate example to understand the importance of the subtlety of experimental variables in the outcome of the modelled disease. Our results indicate that the quality of method information reported in articles about experimental infection with *Trypanosoma spp.* is a cause for concern and it has not shown improvement over time, despite there being evidence that most of these variables do influence the results.

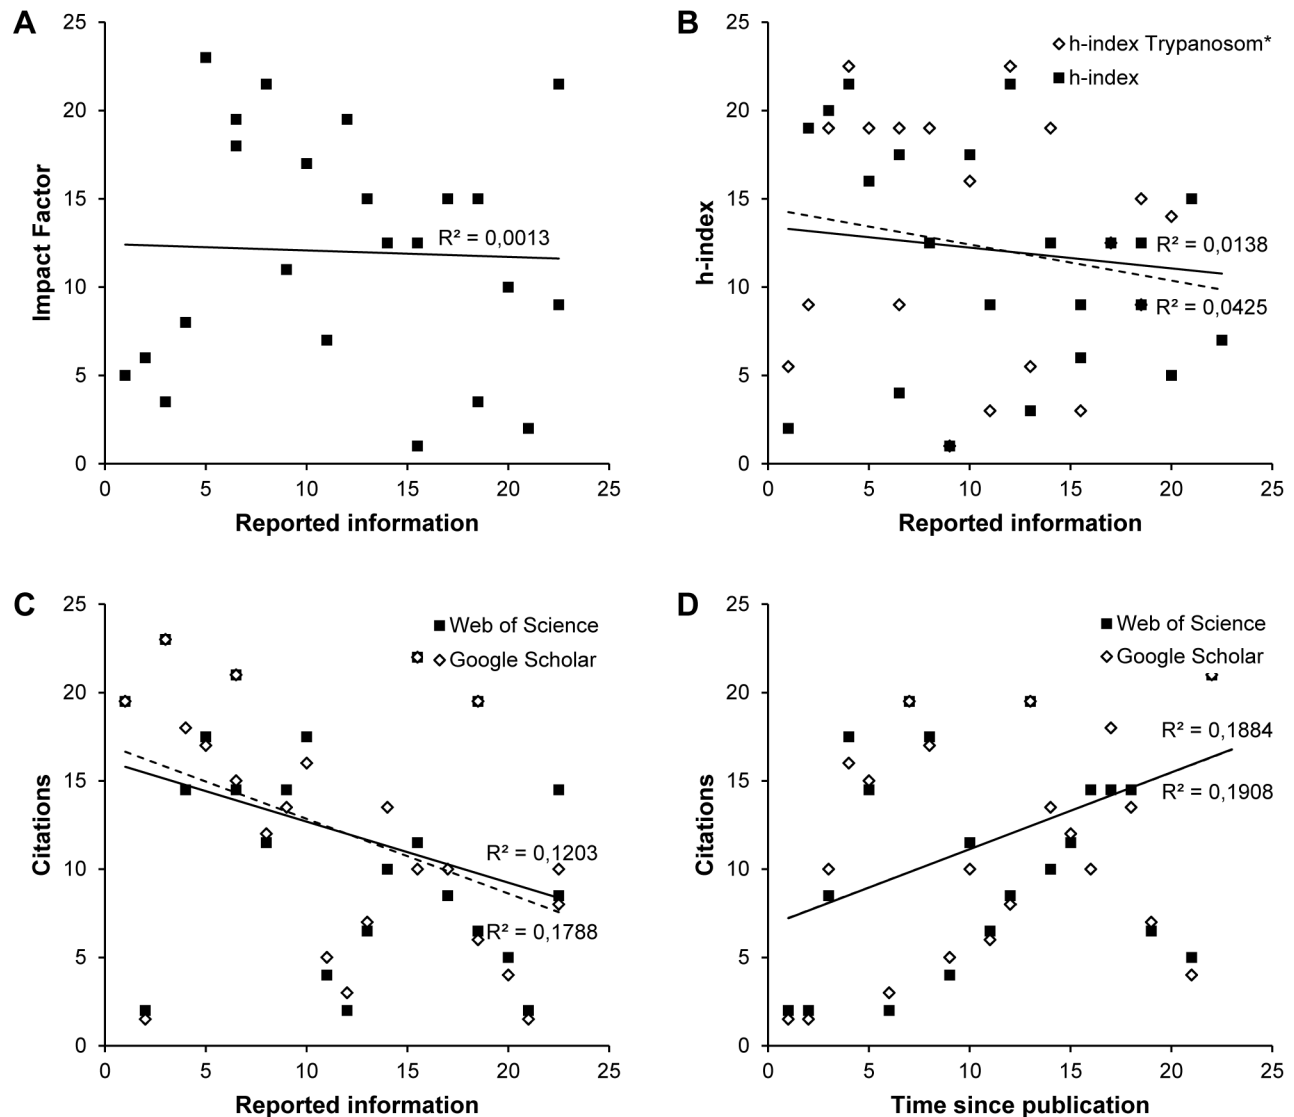

**Figure 3. Scatter plots showing the relationship between the quality of methods reporting and the bibliometric indices.** Journal impact factor in which the papers were published (A), h-index of the corresponding author (B), and number of citations that the articles have received in other publications (C). Spearman's rank correlation coefficient  $r$  is shown alongside the regression lines. The figure shows that there is no correlation between the quality of methods reporting and impact factor [ $r = -0.04$ ,  $p = 0.868$ ]. A similar result is shown with h-index, which was searched using the full name of the corresponding author [ $r = -0.12$ ,  $p = 0.593$ ; continuous line] and then filtered by the topic Trypanosom\* [ $r = -0.21$ ,  $p = 0.345$ ; broken line]. There is a weak but significant correlation between the quality of methods reporting and the number of citations recorded by Google Scholar [ $r = -0.42$ ,  $p = 0.044$ ; broken line], but not by Web of Science [ $r = -0.35$ ,  $p = 0.105$ ; continuous line]. In order to find out if this association is due to a causal effect of the time of publication, a correlation between the number of citations and the time of publication was done (D), and also a weak but significant correlation was shown with the records of Web of Science [ $r = 0.42$ ,  $p = 0.046$ ; continuous line], but not with Google Scholar [ $r = 0.40$ ,  $p = 0.057$ ; broken line]. doi:10.1371/journal.pone.0101131.g003

Many studies have demonstrated the genetic diversity of *Trypanosoma* species [108,109], as well as the diversity of outcome associated with different parasite strains [17]. The classically described differences in humans infected with different subspecies of *T. brucei* or lineages of *T. cruzi* are well recognized. *T. brucei rhodesiense* causes acute disease and *T. brucei gambiense* causes a more chronic infection [110]. *T. b. gambiense* is divided into two groups which differ in phenotype including pathology [111]. In addition, the cardiomyopathy and digestive forms of Chagas' disease have been associated with *T. cruzi* lineage I and *T. cruzi* lineage II respectively [112]. Strain differences have also been observed in the three major strains of *Toxoplasma*, which vary

greatly in their virulence and infection outcome [113]. In addition, isolates of *Trichuris muris* not only differ in virulence but can also trigger changes in the immune response elicited in susceptible hosts [114]; whereas eggs from different strains of *Schistosoma mansoni* cause specific granulomatous responses [115]. Consequently, reporting genus and species of the parasite is not enough; the parasite strain must be reported and if the parasite is a new isolate, it should be characterized.

Virulence of the parasite in all stages of its life cycle plays an important role in the outcome of infection. For example, the failure of laboratory experiments to develop successful malaria vaccines has been attributed to the failure of models to include a

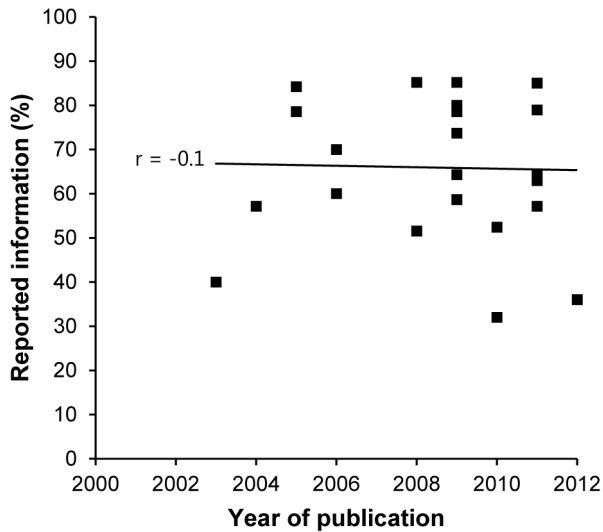

**Figure 4. Scatter plots between the reported information in *Trypanosoma* experiments and year of publication.** The figure shows that there is no correlation [ $p=0.711$ ] and that between 2000 and 2012 the quality of methods reporting has remain constant (arithmetic mean =65.5%).  
doi:10.1371/journal.pone.0101131.g004

skin stage, which is deemed integral to suppressing host immunity and initiating tolerance to the parasite [116]. In *T. cruzi*, several factors have been implicated in the formation of the infective

metacyclic stages. Long-term axenic cultures of *T. cruzi* exhibit a lower capacity to transform into metacyclic trypomastigotes, in comparison to those maintained by alternate invertebrate/vertebrate passages [117]. In addition, the infectivity of *T. cruzi* clones is modified when it is grown in different hosts; a clone passaged through mice has been shown to be more virulent to mice and guinea pigs than the same clone passaged through guinea pigs, the virulence of which remained unchanged [118]. Infection route has also been shown to exert significant impact on the overall course and outcome of infection. In Chagas disease, for instance, the outbreaks associated with food/beverage consumption display severe clinical features in comparison with those of patients that have been infected with *T. cruzi* by vector transmission [119]; a phenomenon that has been associated with the sylvatic biotopes and genotypes of *T. cruzi* [120,121]. In addition, in *Toxoplasma* infections, mice may be susceptible or resistant to infection depending on whether an oral or intraperitoneal challenge is used [122].

Since gender and the corresponding sex steroids affect the immune response [123,124] it is important to specify the gender of experimental animals used. Sex-differences have been demonstrated previously in several experimental infections. For example, in BALB/k mice, males are more resistant to *Toxoplasma gondii* than females [125]. Conversely, in BALB/c mice lacking IL-4, and C57BL/6 p55<sup>-/-</sup> or p75<sup>-/-</sup> mice, it is the female mice that are better at expelling *Trichuris muris* than males [84]. However, only 70% of *Trypanosoma* studies reported the sex of animals used in the experimental infection and only 25% reported the gender of animals used to maintain parasite stocks (Tables S1 and S2). In experimental trypanosome infections a gender-related effect has

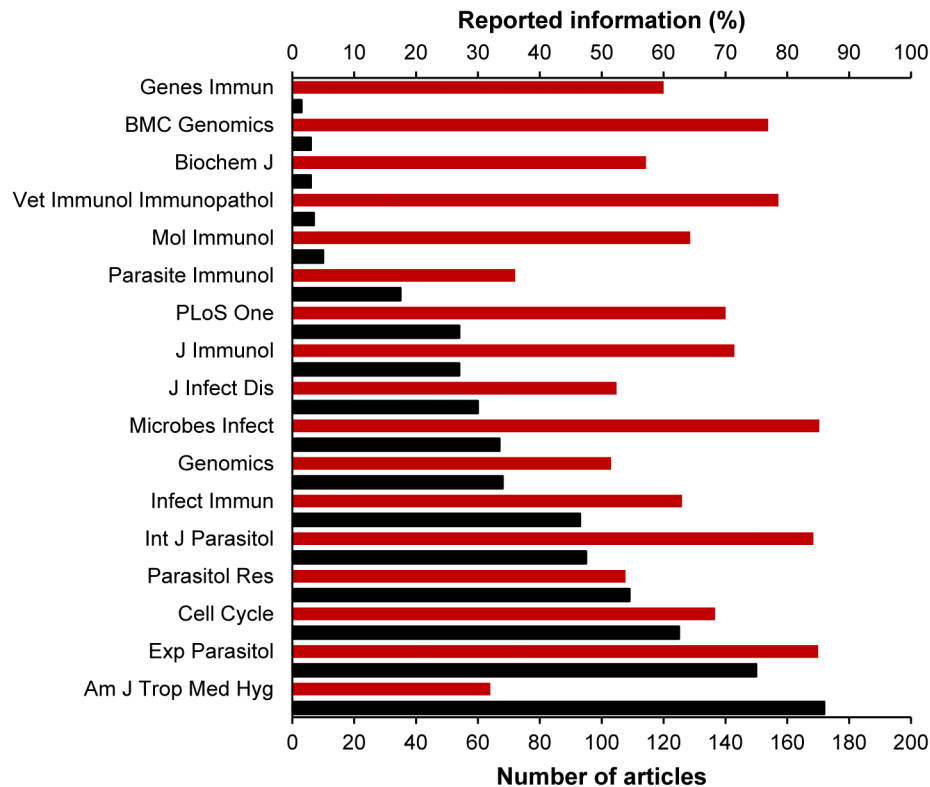

**Figure 5. Diagram of articles about Trypanosomiasis[MeSH] published between 2000 and 2012.** Number of articles published per journal (black bars) and the percentage of methods reporting (red bars). The figure shows that the quality of method reporting is not related with the number of papers published by any one of the journals.  
doi:10.1371/journal.pone.0101131.g005



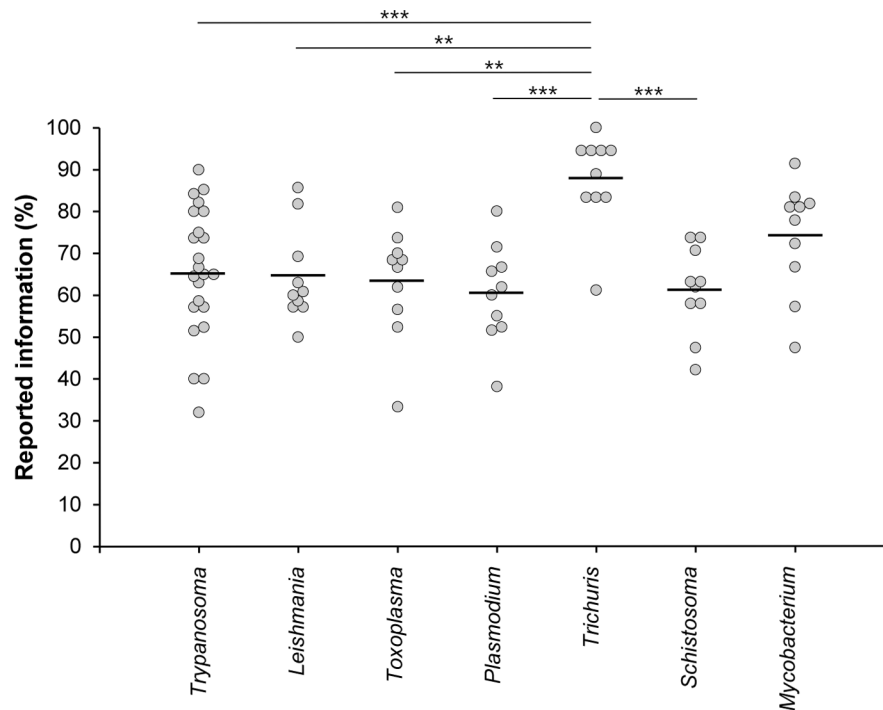

**Figure 6. Box-percentile plot to compare the quality of methods reporting in parasitology experiments.** Articles about “Trypanosomiasis”[MeSH]; “Leishmaniasis”[MeSH]; “Toxoplasmosis”[MeSH]; “Malaria”[MeSH]; “Trichuris”[MeSH]; “Schistosoma”[MeSH] and “Tuberculosis”[MeSH]. The figure shows that the experimental model of colitis induced by *Trichuris* had the highest scores, followed by tuberculosis, *Trypanosoma*, *Toxoplasma*, *Leishmania*, *Plasmodium* and *Schistosoma* experiments. P values less than 0.01 and 0.001 are represented by \*\* and \*\*\* respectively.

doi:10.1371/journal.pone.0101131.g006

been shown: using BALB/c mice infected with a natural dose of vector-derived metacyclic trypomastigotes of *T. cruzi* (100 parasites/mouse) the peak of parasitaemia in males was about four-fold higher than that in females [126]. Similarly, an experimental infection with a strain of *T. brucei brucei* at 50% of the mouse lethal dose showed that the female were more trypanotolerant than the males and there was no evidence that this was X-linked [127,128]. Housing conditions and social environment also affect the course of experimental trypanosome infections. For example, the parasitaemia levels vary according to whether the animals are kept individually or in a group due to pheromones of the opposite sex [126,129]. Furthermore, hormonal profiles during the oestrous cycle are not only modified by the parasite; such as *T. congolense* [130], but also by the light/dark cycle conditions [131].

In the case of contradictory results, the reporting of the essential parameters that describe a parasitic experimental infection can help to determine the nature of their discrepancies. To exemplify this issue, we have chosen two papers published in the journal *Infection and Immunity* that were undertaken to assess the role of Nitric Oxide (NO) in immunity to *T. cruzi* infection and their experiments showed contradictory results. Vespa *et al.* claim that NO is involved in control of *T. cruzi*-induced parasitaemia [20], whereas Cummings *et al.* claim that NO is not required for control of *T. cruzi* in the acute or chronic stages of the infection [23]. However, although these studies were carried out using female mice on a C57BL/6 background, the experimental infections were performed using different *T. cruzi* strains, which could explain, at least in part, the differences in their findings: mice infected with  $10^4$  trypomastigotes of the Y strain showed peak parasitaemia at day 8 that decreased thereafter [20], whereas mice infected with

$10^3$  trypomastigotes of the Brazil strain showed a peak at day 30 and decreased thereafter [23]. Moreover, although both infections were performed with blood-derived trypomastigotes none of them reported species, gender and age of the animals used to culture the parasite; important parameters that modified the infectivity of *T. cruzi* [117,118]. In addition, there is experimental evidence that shows significant differences among parasitaemia curves between older and younger BALB/c mice infected with a long-term mouse-passaged clone of the *T. cruzi* isolate TolAc1; higher parasitaemia levels were observed in older animals (31-day-old) with lower inoculum ( $3 \times 10^4$  trypomastigotes) than younger animals (8-day-old) with higher inoculum ( $9 \times 10^4$  trypomastigotes) [118]. However, the age of the animals used to evaluate the role of NO in the control of *T. cruzi* infection was reported by Vespa *et al.* but not by Cummings *et al.* [20,23]. Thus, these and other conditions that could also influence the parasitaemia and, hence, the researched outcome should be reported in order to understand the complexity of these parasitoses.

Although the information collected through the checklist should be reported for all *Trypanosoma* experiments, some information could be inferred from the characteristics of the experimental processes, although this depends on the level of expertise of observers (i.e. non-experts and experts). In this way, a factor such as the stage of the parasite used for a *T. cruzi* infection could be easily inferred by an expert since he/she knows that the infectious stage is the trypomastigote. Moreover, both experts and non-experts could also infer many details of the conditions used in cell cultures by assuming experimenters have opted for the most commonly used parameters. For example temperature and CO<sub>2</sub> atmosphere are usually set to 37°C and 5% of CO<sub>2</sub>. However, neither experts nor non-experts could infer the species and strain



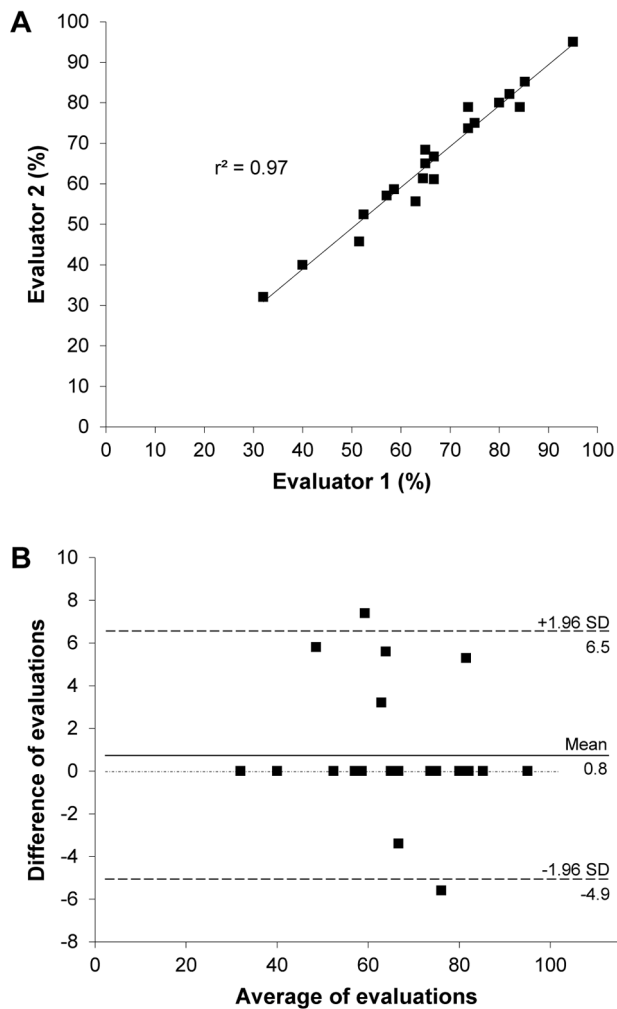

**Figure 7. Linear correlation (A) and Bland-Altman (B) plots between scores of method reporting in *Trypanosoma* experiments.** Evaluation based strictly on what was explicitly included in the published paper (Evaluator 1) and on interpretations and assumptions determined by an expert in the field (Evaluator 2). doi:10.1371/journal.pone.0101131.g007

of the parasite; age and gender of the host; or the inoculum used in the infection assays, among others. Thus the validation of data becomes a difficult or impossible task when there is not only not enough information about the method used, but also most of the missing information cannot be inferred, even by an expert.

Providing a high-quality description of the experimental method is important not only to replicate and reproduce, but also to compare and integrate that data and, hence, facilitate translational

discoveries. The issues found in reporting methods probably stem, at least in part, from the current structure of scientific publishing, which is not adequate to effectively communicate complex experimental methods. This problem has been recognised, with some journals already introducing editorial measures and methods checklists in order to improve the quality of methods reporting [132].

For the field of trypanosomiasis we have created a checklist to guide parasitologists in reporting *Trypanosoma* experiments (see Annex 1). This checklist included the minimum information that should be provided when describing the parasite, host and infection aspects of those experiments. Our checklist does not cover aspects inherent to each possible experimental assay such as those derived from omics and conventional technologies. In these cases, the BioSharing catalogue [133] should be consulted for checklists: e.g. the Minimum Information About a Microarray Experiment (MIAME) and Proteomics Experiment (MIAPE); and the Minimum Information for Publication of Quantitative Real-Time PCR Experiments (MIQE). Moreover, there are other guidelines such as the Minimum Information About a Cellular Assay (MIACA) and the Animals in Research: Reporting *In Vivo* Experiments (ARRIVE) that provide detailed descriptions of experiments performed on cell and animal models.

In conclusion, it has become clear that biomedical science is plagued by findings that cannot be reproduced and/or compared; and the parasitology community is no stranger to this, as has been shown by this study. Nevertheless, the scientific community that works on trypanosomiasis is small and many of them know each other personally so in principle it should be possible to change the way that *Trypanosoma* experiments are reported. However, it is important that the scientific community as a whole is engaged with that process. Finally, the checklist has been demonstrated to be applicable to several different infection models and could be implemented to improve the quality of methods reporting for all infection experiments in principle.

## Materials and Methods

### Search strategy

The method of the literature review follows the recommendations outlined in the PRISMA guidelines [134]. A protocol was designed to identify the method information reported in published articles that utilised experimental infection with *Trypanosoma* species, where the effects on gene expression –transcriptomics and proteomics– of the host were studied. Criteria in three domains were evaluated: characteristics and culture conditions of the parasite, characteristics and maintenance conditions of the host and the infection procedure. The protocol used here for capturing data has not been previously published.

The literature search was conducted using Medline via PubMed. The database was searched in April 2013 for articles that were published between 1<sup>st</sup> January, 2000 and 31<sup>st</sup> December,

**Table 2.** Search terms used in PubMed.

| Search   | Terms                                                   |
|----------|---------------------------------------------------------|
| Search 1 | "Genes"[MeSH] AND "Trypanosomiasis"[MeSH]               |
| Search 2 | "Proteins"[MeSH] AND "Trypanosomiasis"[MeSH]            |
| Search 3 | "Microarray Analysis"[MeSH] AND "Trypanosomiasis"[MeSH] |
| Search 4 | "Proteomics"[MeSH] AND "Trypanosomiasis"[MeSH]          |

doi:10.1371/journal.pone.0101131.t002

**Table 3.** Checklist for the reporting of *Trypanosoma* experiments.

| Topic                                                  | Item# | Description                                                                 | Does it meet? |
|--------------------------------------------------------|-------|-----------------------------------------------------------------------------|---------------|
| <b>Parasite information</b>                            |       |                                                                             |               |
| General                                                | 1     | Identify the species of the parasite                                        |               |
|                                                        | 2     | Identify the strain of the parasite                                         |               |
|                                                        | 3     | Identify the stage of the parasite used                                     |               |
| Culture conditions for parasites grown <i>in vivo</i>  | 4     | Identify the species and strain of the animal                               |               |
|                                                        | 5     | Describe the age of the animal                                              |               |
|                                                        | 6     | Describe the gender of the animal                                           |               |
|                                                        | 7     | Identify the parasite collection sample                                     |               |
| Culture conditions for parasites grown <i>in vitro</i> | 8     | Identify the cell type                                                      |               |
|                                                        | 9     | Describe the culture medium used                                            |               |
|                                                        | 10    | Describe the supplements and antibiotics used                               |               |
|                                                        | 11    | Describe the temperature and CO <sub>2</sub> atmosphere of the culture      |               |
| Time of growing                                        | 12    | Describe the time of growing of the parasite prior to infection             |               |
| <b>Host information</b>                                |       |                                                                             |               |
| Animals                                                | 13    | Identify the species and strain of the animal                               |               |
|                                                        | 14    | Describe the age of the animal                                              |               |
|                                                        | 15    | Describe the gender of the animal                                           |               |
|                                                        | 16    | Describe the housing conditions (light/dark cycle)                          |               |
|                                                        | 17    | Describe the method of sacrifice                                            |               |
| Cell                                                   | 18    | Identify the cell type                                                      |               |
|                                                        | 19    | In primary culture, identify the organ/tissue from which cells come         |               |
|                                                        | 20    | In primary culture, describe the method of purification of the cells        |               |
|                                                        | 21    | Describe the culture medium used                                            |               |
|                                                        | 22    | Describe the supplements and antibiotics used                               |               |
|                                                        | 23    | Describe the temperature and CO <sub>2</sub> atmosphere of the culture      |               |
|                                                        | 24    | Describe the time of growing of the cells prior to infection                |               |
| <b>Experimental infection information</b>              |       |                                                                             |               |
| Animal                                                 | 25    | Describe the inoculum –parasites per animal- used                           |               |
|                                                        | 26    | Describe the way of inoculation                                             |               |
|                                                        | 27    | Describe the medium of inoculation                                          |               |
|                                                        | 28    | Report the parasitaemia and the time in which the parasitaemia was measured |               |
|                                                        | 29    | Report the mortality of the animals post-infection                          |               |
| Cell                                                   | 30    | Report the purity of the primary culture                                    |               |
|                                                        | 31    | Report the viability of cells prior infection                               |               |
|                                                        | 32    | Describe the ratio –parasites per cell- used                                |               |
| Parasite                                               | 33    | Report the percentage of infected cells                                     |               |
|                                                        | 34    | Report the viability of parasites prior infection                           |               |
|                                                        | 35    | Describe the purity of infective forms of the parasite                      |               |
|                                                        | 36    | Describe the time course (length) of infection                              |               |

doi:10.1371/journal.pone.0101131.t003

2012 using the MeSH (Medical Subject Headings) terms as they appear in Table 2. The PubMed Identifier (PMID) numbers were used to identify those articles that were common between “Genes” AND “Trypanosomiasis” and “Proteins” AND “Trypanosomiasis”. The search was not limited by study design or by language of publication. The year 2000 was chosen because it was the year in which the first rough draft of the human genome was completed [135,136] and these data were used in many fields of medicine including infectious disease. In addition, we chose to focus on gene expression profiling in the host due to an experimental *Trypano-*

*soma* infection because it provides the broadest evidence about the molecular pathophysiology of trypanosomiasis.

In order to compare the quality of method reporting in *Trypanosoma* experiments with the reporting of other parasitic disease infections we collected a subset of *Leishmania*, *Toxoplasma* and *Plasmodium* experimental infection models, since diseases produced by them are also complex and considered public health issues. In addition, as a comparative control of methods reporting in experimental infections, we sought two models of worm infection: one with a simple life cycle (*Trichuris muris*) and

another with a complex life cycle (*Schistosoma sp.*); requiring adaptation for survival in fresh water as free-living forms and as parasites in snail intermediate and vertebrate definitive hosts. In addition, we assessed tuberculosis infectious models in order to have a general idea about the quality of method reporting in non-parasitic infection models. Tuberculosis was chosen because it is probably one of the most studied infectious disease.

The same search strategy was carried out where the MeSH term “Trypanosomiasis” was replaced with the following MeSH terms: “Leishmaniasis”, “Toxoplasmosis”, “Malaria”, “*Trichuris*”, “*Schistosoma*” and “Tuberculosis”. To avoid selection bias, the articles were randomly ordered and the first 10 articles for each extra parasitosis and the non-parasitic infection model (*Mycobacterium*) that described gene expression profiling in the host due to an experimental infection were selected.

Study selection was made by one reviewer and checked independently by a second reviewer; any disagreement was resolved by consensus or by discussion with a third reviewer. Only primary research papers were included in the search. The titles and abstracts of articles were reviewed and analysed in detail to filter out those in which the experiments were performed on the parasite or on vector insects and keep those done on the host. This corpus of articles was then used to confirm eligibility and to extract data.

### Structure definition and data extraction

A checklist that contains the minimum information required about the parasite, host and infection to describe an experiment carried out with any *Trypanosoma* species was elaborated by experts in the field of trypanosomiasis research and it is presented in Table 3. Pre-analytical variables in the methods were prioritised in this list because they are critical for interpretation of the results. The terms were classified into three domains according to their roles in a *Trypanosoma* experiment: the host, the parasite and the infection. A data extraction sheet was developed to annotate the information reported in the methods and results sections. Data extraction and quality assessment were carried out by one author and checked by a second reviewer, and inconsistencies were discussed by both reviewers and consensus reached.

### Bibliometric indices

Bibliometric parameters were used to determine if they were associated with the quality of method reporting. The impact factor (IF) of each journal was retrieved from the Institute for Scientific Information (ISI) Web of Knowledge’s Journal Citation Reports database science edition 2011. The number of citations was measured by the total recorded for each article by Thomson Scientific’s Web of Science and Google Scholar in May 2013. For each corresponding author, the h-index was obtained through Thomson Scientific’s Web of Science using a citation window up to one year before the article was published. The h-index was searched in two different ways: first, using the full name of the corresponding author and second, filtering the result by topic, using the term “Trypanosom\*”. The number of articles published for each journal about trypanosomiasis was sought in PubMed using the short name of the journals and the MeSH term “Trypanosomiasis”. The search was filtered by time; from 1<sup>st</sup> January, 2000 to 31<sup>st</sup> December, 2012.

### Validity of scoring methods

An expert in trypanosomiasis tested the quality of reported information on *Trypanosoma* experiments. The expert scored the

corpus of articles using the checklist that contains the minimum information required to describe a *Trypanosoma* experiment (Table 3). This evaluation was based strictly on what was explicitly included in the published paper and its results are presented throughout this article. The validity of this assessment was tested based on its agreement with another evaluation based on interpretations and assumptions determined by another expert in the field in order to avoid bias of the retrieval results by interpretation.

### Statistical analysis

For each article, the percentage of reported information in each article domain was obtained by direct counting. Linear and Spearman’s rank correlations and Bland-Altman comparison were calculated using STATA software [137] and the equivalence of between scores obtained by the evaluators was determined by a correlation test. Comparisons between experimental infection models were performed using a one-way ANOVA in GraphPad PRISM 4 software [138].

### Supporting Information

**Table S1** Quality measures of the studies that failed to fulfil any one of data of minimal information about the parasite in *Trypanosoma* experiments.  
(PDF)

**Table S2** Quality measures of the studies that failed to fulfil any one of data of minimal information about the host in *Trypanosoma* experiments.  
(PDF)

**Table S3** Quality measures of the studies that failed to fulfil any one of data of minimal information about the experimental infection in *Trypanosoma* experiments.  
(PDF)

**Table S4** Bibliometric indices in reporting *Trypanosoma* experiments.  
(PDF)

**Table S5** Quality measures of the studies that failed to supply any one of the criteria for minimal information about the parasite in *Leishmania*, *Toxoplasma*, *Plasmodium*, *Trichuris*, *Schistosoma* and *Mycobacterium* experiments.  
(PDF)

**Table S6** Quality measures of the studies that failed to supply any one of the criteria for minimal information about the host in *Leishmania*, *Toxoplasma*, *Plasmodium*, *Trichuris*, *Schistosoma* and *Mycobacterium* experiments.  
(PDF)

**Table S7** Quality measures of the studies that failed to supply any one of the criteria for minimal information about the experimental infection in *Leishmania*, *Toxoplasma*, *Plasmodium*, *Trichuris*, *Schistosoma* and *Mycobacterium* experiments.  
(PDF)

**Checklist S1** PRISMA Checklist.  
(DOC)

### Author Contributions

Conceived and designed the experiments: OF-V RS AB. Performed the experiments: OF-V MB HN SC. Analyzed the data: OF-V MB HN SC. Wrote the paper: OF-V MB HN SC RS AB.

## References

- Ioannidis JP (2005) Why most published research findings are false. *PLoS Med* 2: e124.
- Anon (19 Oct 2013) Unreliable research: Trouble at the lab. *The Economist*. Available: <http://www.economist.com/news/briefing/21588057-scientists-think-science-self-correcting-alarming-degree-it-not-trouble>. Accessed 20 October 2013.
- Anon (14 Aqs 2012) The Reproducibility Initiative. Available: <https://www.scienceexchange.com/reproducibility>. Accessed 17 January 2014.
- Sandve GK, Nekrutenko A, Taylor J, Hovig E (2013) Ten Simple Rules for Reproducible Computational Research. *PLoS Comp Biol* 9: e1003285.
- Casadevall A, Fang FC (2010) Reproducible science. *Infect Immun* 78: 4972–4975.
- Drummond C (2009) Replicability is not Reproducibility: Nor is it a good science. Paper presented at: Evaluation Methods for Machine Learning Workshop at the 26th International Conference on Machine Learning; June 2009; Montreal, Quebec, Canada. Available at: <http://cogprints.org/7691/7/ICMLws09.pdf>.
- International Committee of Medical Journal Editors Uniform Requirements for Manuscripts Submitted to Biomedical Journals: Writing and Editing for Biomedical Publications. <http://www.icmje.org/#prepare>.
- Taylor CF, Field D, Sansone SA, Aerts J, Apweiler R, et al. (2008) Promoting coherent minimum reporting guidelines for biological and biomedical investigations: the MIBBI project. *Nat Biotechnol* 26: 889–896.
- Brazma A, Hingamp P, Quackenbush J, Sherlock G, Spellman P, et al. (2001) Minimum information about a microarray experiment (MIAME)-toward standards for microarray data. *Nat Genet* 29: 365–371.
- Taylor CF, Paton NW, Lilley KS, Binz PA, Julian RK, Jr., et al. (2007) The minimum information about a proteomics experiment (MIAPE). *Nat Biotechnol* 25: 887–893.
- Simarro PP, Diarra A, Ruiz Postigo JA, Franco JR, Jannin JG (2011) The human African trypanosomiasis control and surveillance programme of the World Health Organization 2000–2009: the way forward. *PLoS Negl Trop Dis* 5: e1007.
- Schmunis GA, Yadon ZE (2010) Chagas disease: a Latin American health problem becoming a world health problem. *Acta Trop* 115: 14–21.
- Hotez PJ, Dumonteil E, Betancourt Cravioto M, Bottazzi ME, Tapia-Conyer R, et al. (2013) An Unfolding Tragedy of Chagas Disease in North America. *PLoS Negl Trop Dis* 7: e2300.
- Kristjanson PM, Swallow BM, Rowlands GJ, Kruska RL, de Leeuw PN (1999) Measuring the costs of African animal trypanosomiasis, the potential benefits of control and returns to research. *Agr Syst* 59: 79–98.
- Goodhead I, Archibald A, Amwayi P, Brass A, Gibson J, et al. (2010) A comprehensive genetic analysis of candidate genes regulating response to *Trypanosoma congolense* infection in mice. *PLoS Negl Trop Dis* 4: e880.
- Vasconcelos RH, Montenegro SM, Azevedo EA, Gomes YM, Morais CN (2012) Genetic susceptibility to chronic Chagas disease: an overview of single nucleotide polymorphisms of cytokine genes. *Cytokine* 59: 203–208.
- Goodhead I, Capewell P, Bailey JW, Beament T, Chance M, et al. (2013) Whole-genome sequencing of *Trypanosoma brucei* reveals introgression between subspecies that is associated with virulence. *mBio* 4: e00197-00113.
- da Matta Guedes PM, Gutierrez FR, Maia FL, Milanezi CM, Silva GK, et al. (2010) IL-17 produced during *Trypanosoma cruzi* infection plays a central role in regulating parasite-induced myocarditis. *PLoS Negl Trop Dis* 4: e604.
- de Araujo FF, da Silveira AB, Correa-Oliveira R, Chaves AT, Adad SJ, et al. (2011) Characterization of the presence of Foxp3(+) T cells from patients with different clinical forms of Chagas' disease. *Hum Pathol* 42: 299–301.
- Vespa GN, Cunha FQ, Silva JS (1994) Nitric oxide is involved in control of *Trypanosoma cruzi*-induced parasitemia and directly kills the parasite in vitro. *Infect Immun* 62: 5177–5182.
- Miyazaki Y, Hamano S, Wang S, Shimano Y, Iwakura Y, et al. (2010) IL-17 is necessary for host protection against acute-phase *Trypanosoma cruzi* infection. *J Immunol* 185: 1150–1157.
- Kotner J, Tarleton R (2007) Endogenous CD4(+) CD25(+) regulatory T cells have a limited role in the control of *Trypanosoma cruzi* infection in mice. *Infect Immun* 75: 861–869.
- Cummings KL, Tarleton RL (2004) Inducible nitric oxide synthase is not essential for control of *Trypanosoma cruzi* infection in mice. *Infect Immun* 72: 4081–4089.
- Mukherjee S, Belbin TJ, Spray DC, Iacobas DA, Weiss LM, et al. (2003) Microarray analysis of changes in gene expression in a murine model of chronic chagasic cardiomyopathy. *Parasitol Res* 91: 187–196.
- Mukherjee S, Nagajothi F, Mukhopadhyay A, Machado FS, Belbin TJ, et al. (2008) Alterations in myocardial gene expression associated with experimental *Trypanosoma cruzi* infection. *Genomics* 91: 423–432.
- Garg N, Gerstner A, Bhatia V, DeFord J, Papaconstantinou J (2004) Gene expression analysis in mitochondria from chagasic mice: alterations in specific metabolic pathways. *Biochem J* 381: 743–752.
- Hashimoto M, Nakajima-Shimada J, Ishidoh K, Aoki T (2005) Gene expression profiles in response to Fas stimulation in *Trypanosoma cruzi*-infected host cells. *Int J Parasitol* 35: 1587–1594.
- Goldenberg RC, Iacobas DA, Iacobas S, Rocha LL, da Silva de Azevedo Fortes F, et al. (2009) Transcriptomic alterations in *Trypanosoma cruzi*-infected cardiac myocytes. *Microbes Infect* 11: 1140–1149.
- Chessler AD, Unnikrishnan M, Bei AK, Daily JP, Burleigh BA (2009) *Trypanosoma cruzi* triggers an early type I IFN response in vivo at the site of intradermal infection. *J Immunol* 182: 2288–2296.
- Costales JA, Daily JP, Burleigh BA (2009) Cytokine-dependent and-independent gene expression changes and cell cycle block revealed in *Trypanosoma cruzi*-infected host cells by comparative mRNA profiling. *BMC Genomics* 10: 252.
- Soares MB, de Lima RS, Rocha LL, Vasconcelos JF, Rogatto SR, et al. (2010) Gene expression changes associated with myocarditis and fibrosis in hearts of mice with chronic chagasic cardiomyopathy. *J Infect Dis* 202: 416–426.
- Soares MB, Lima RS, Souza BS, Vasconcelos JF, Rocha LL, et al. (2011) Reversion of gene expression alterations in hearts of mice with chronic chagasic cardiomyopathy after transplantation of bone marrow cells. *Cell Cycle* 10: 1448–1455.
- Manque PA, Probst CM, Pereira MC, Rampazzo RC, Ozaki LS, et al. (2011) *Trypanosoma cruzi* infection induces a global host cell response in cardiomyocytes. *Infect Immun* 79: 1855–1862.
- Genovesio A, Giardini MA, Kwon YJ, de Macedo Dossin F, Choi SY, et al. (2011) Visual genome-wide RNAi screening to identify human host factors required for *Trypanosoma cruzi* infection. *PLoS One* 6: e19733.
- Tanowitz HB, Mukhopadhyay A, Ashton AW, Lisanti MP, Machado FS, et al. (2011) Microarray analysis of the mammalian thromboxane receptor-*Trypanosoma cruzi* interaction. *Cell Cycle* 10: 1132–1143.
- Kierstein S, Noyes H, Naessens J, Nakamura Y, Pritchard C, et al. (2006) Gene expression profiling in a mouse model for African trypanosomiasis. *Genes Immun* 7: 667–679.
- Li SQ, Reid SA, Fung MC, Inoue N, Lun ZR (2009) Analysis of gene expression profiles in the liver and spleen of mice infected with *Trypanosoma evansi* by using a cDNA microarray. *Parasitol Res* 104: 385–397.
- Noyes HA, Alimohammadian MH, Agaba M, Brass A, Fuchs H, et al. (2009) Mechanisms controlling anaemia in *Trypanosoma congolense* infected mice. *PLoS One* 4: e5170.
- O'Gorman GM, Park SD, Hill EW, Meade KG, Coussens PM, et al. (2009) Transcriptional profiling of cattle infected with *Trypanosoma congolense* highlights gene expression signatures underlying trypanotolerance and trypanosusceptibility. *BMC Genomics* 10: 207.
- Amin DN, Ngoyi DM, Nkhwachi GM, Palomba M, Rottenberg M, et al. (2010) Identification of stage biomarkers for human African trypanosomiasis. *Am J Trop Med Hyg* 82: 983–990.
- Li SQ, Luckins A, Lun ZR (2011) *Trypanosoma brucei brucei*: A comparison of gene expression in the liver and spleen of infected mice utilizing cDNA microarray technology. *Exp Parasitol* 128: 256–264.
- Mekata H, Konnai S, Mingala CN, Abes NS, Gutierrez CA, et al. (2012) Kinetics of regulatory dendritic cells in inflammatory responses during *Trypanosoma evansi* infection. *Parasite Immunol* 34: 318–329.
- Meade KG, O'Gorman GM, Hill EW, Nanciandi F, Agaba M, et al. (2009) Divergent antimicrobial peptide (AMP) and acute phase protein (APP) responses to *Trypanosoma congolense* infection in trypanotolerant and trypanosusceptible cattle. *Mol Immunol* 47: 196–204.
- Hill EW, O'Gorman GM, Agaba M, Gibson JP, Hanotte O, et al. (2005) Understanding bovine trypanosomiasis and trypanotolerance: the promise of functional genomics. *Vet Immunol Immunopathol* 105: 247–258.
- Lopez R, Demick KP, Mansfield JM, Paulnock DM (2008) Type I IFNs play a role in early resistance, but subsequent susceptibility, to the African trypanosomes. *J Immunol* 181: 4908–4917.
- Graefe SE, Streichert T, Budde BS, Nurnberg P, Steeg C, et al. (2006) Genes from Chagas susceptibility loci that are differentially expressed in *T. cruzi*-resistant mice are candidates accounting for impaired immunity. *PLoS One* 1: e57.
- Park AY, Hondowicz BD, Scott P (2000) IL-12 is required to maintain a Th1 response during *Leishmania major* infection. *J Immunol* 165: 896–902.
- Kinjo I, Inoue H, Hamano S, Fukuyama S, Yoshimura T, et al. (2006) Loss of SOCS3 in T helper cells resulted in reduced immune responses and hyperproduction of interleukin 10 and transforming growth factor-beta 1. *J Exp Med* 203: 1021–1031.
- Guerfali FZ, Laouini D, Guizani-Tabbane L, Ottones F, Ben-Aissa K, et al. (2008) Simultaneous gene expression profiling in human macrophages infected with *Leishmania major* parasites using SAGE. *BMC Genomics* 9: 238.
- Ehrchen JM, Roebrock K, Foell D, Nippe N, von Stebut E, et al. (2010) Keratinocytes determine Th1 immunity during early experimental leishmaniasis. *PLoS Pathog* 6: e1000871.
- Biswas A, Bhattacharya A, Kar S, Das PK (2011) Expression of IL-10-triggered STAT3-dependent IL-4Ralpha is required for induction of arginase 1 in visceral leishmaniasis. *Eur J Immunol* 41: 992–1003.
- Bertholet S, Debrabant A, Afrin F, Caler E, Mendez S, et al. (2005) Antigen requirements for efficient priming of CD8+ T cells by *Leishmania major*-infected dendritic cells. *Infect Immun* 73: 6620–6628.

53. Brunner C, Sindrilaru A, Girkontaite I, Fischer KD, Sunderkotter C, et al. (2007) BOB.1/OBF.1 controls the balance of TH1 and TH2 immune responses. *EMBO J* 26: 3191–3202.
54. Filippi C, Hugues S, Cazareth J, Julia V, Glaichenhaus N, et al. (2003) CD4+ T cell polarization in mice is modulated by strain-specific major histocompatibility complex-independent differences within dendritic cells. *J Exp Med* 198: 201–209.
55. Jayakumar A, Widenmaier R, Ma X, McDowell MA (2008) Transcriptional inhibition of interleukin-12 promoter activity in *Leishmania* spp.-infected macrophages. *J Parasitol* 94: 84–93.
56. Vivarini Ade C, Pereira Rde M, Teixeira KL, Calegari-Silva TC, Bellio M, et al. (2011) Human cutaneous leishmaniasis: interferon-dependent expression of double-stranded RNA-dependent protein kinase (PKR) via TLR2. *FASEB J* 25: 4162–4173.
57. Gail M, Gross U, Bohne W (2001) Transcriptional profile of *Toxoplasma gondii*-infected human fibroblasts as revealed by gene-array hybridization. *Mol Genet Genomics* 265: 905–912.
58. Knight BC, Kissane S, Falciani F, Salmon M, Stanford MR, et al. (2006) Expression analysis of immune response genes of Muller cells infected with *Toxoplasma gondii*. *J Neuroimmunol* 179: 126–131.
59. Ju CH, Chockalingam A, Leifer CA (2009) Early response of mucosal epithelial cells during *Toxoplasma gondii* infection. *J Immunol* 183: 7420–7427.
60. Okomo-Adhiambo M, Beattie C, Rink A (2006) cDNA microarray analysis of host-pathogen interactions in a porcine in vitro model for *Toxoplasma gondii* infection. *Infect Immun* 74: 4254–4265.
61. Zhou DH, Yuan ZG, Zhao FR, Li HL, Zhou Y, et al. (2011) Modulation of mouse macrophage proteome induced by *Toxoplasma gondii* tachyzoites in vivo. *Parasitol Res* 109: 1637–1646.
62. Watford WT, Hissong BD, Durant LR, Yamane H, Muul LM, et al. (2008) Tpl2 kinase regulates T cell interferon-gamma production and host resistance to *Toxoplasma gondii*. *J Exp Med* 205: 2803–2812.
63. Tato CM, Villarino A, Caamano JH, Boothby M, Hunter CA (2003) Inhibition of NF-kappa B activity in T and NK cells results in defective effector cell expansion and production of IFN-gamma required for resistance to *Toxoplasma gondii*. *J Immunol* 170: 3139–3146.
64. Fux B, Rodrigues CV, Portela RW, Silva NM, Su C, et al. (2003) Role of cytokines and major histocompatibility complex restriction in mouse resistance to infection with a natural recombinant strain (type I-III) of *Toxoplasma gondii*. *Infect Immun* 71: 6392–6401.
65. Fang R, Nie H, Wang Z, Tu P, Zhou D, et al. (2009) Protective immune response in BALB/c mice induced by a suicidal DNA vaccine of the MIC3 gene of *Toxoplasma gondii*. *Vet Parasitol* 164: 134–140.
66. Desolme B, Mevelec MN, Buzoni-Gatel D, Bout D (2000) Induction of protective immunity against toxoplasmosis in mice by DNA immunization with a plasmid encoding *Toxoplasma gondii* GRA4 gene. *Vaccine* 18: 2512–2521.
67. Ylostalo J, Randall AC, Myers TA, Metzger M, Krogstad DJ, et al. (2005) Transcriptome profiles of host gene expression in a monkey model of human malaria. *J Infect Dis* 191: 400–409.
68. Carapau D, Kruhofer M, Chatalbash A, Orengo JM, Mota MM, et al. (2007) Transcriptome profile of dendritic cells during malaria: cAMP regulation of IL-6. *Cell Microbiol* 9: 1738–1752.
69. Miu J, Hunt NH, Ball HJ (2008) Predominance of interferon-related responses in the brain during murine malaria, as identified by microarray analysis. *Infect Immun* 76: 1812–1824.
70. Albuquerque SS, Carret C, Grosso AR, Tarun AS, Peng X, et al. (2009) Host cell transcriptional profiling during malaria liver stage infection reveals a coordinated and sequential set of biological events. *BMC Genomics* 10: 270.
71. Delic D, Dkhil M, Al-Quraishy S, Wunderlich F (2011) Hepatic miRNA expression reprogrammed by *Plasmodium chabaudi* malaria. *Parasitol Res* 108: 1111–1121.
72. Rosanas-Urgell A, Martin-Jaular L, Ricarte-Filho J, Ferrer M, Kalko S, et al. (2012) Expression of non-TLR pattern recognition receptors in the spleen of BALB/c mice infected with *Plasmodium yoelii* and *Plasmodium chabaudi*. *Mem Inst Oswaldo Cruz* 107: 410–415.
73. Randall LM, Amante FH, McSweeney KA, Zhou Y, Stanley AC, et al. (2008) Common strategies to prevent and modulate experimental cerebral malaria in mouse strains with different susceptibilities. *Infect Immun* 76: 3312–3320.
74. Oakley MS, McCutchan TF, Anantharaman V, Ward JM, Faucette L, et al. (2008) Host biomarkers and biological pathways that are associated with the expression of experimental cerebral malaria in mice. *Infect Immun* 76: 4518–4529.
75. Lovegrove FE, Pena-Castillo L, Mohammad N, Liles WC, Hughes TR, et al. (2006) Simultaneous host and parasite expression profiling identifies tissue-specific transcriptional programs associated with susceptibility or resistance to experimental cerebral malaria. *BMC Genomics* 7: 295.
76. Delahaye NF, Collet N, Puthier D, Barbier M, Benech P, et al. (2007) Gene expression analysis reveals early changes in several molecular pathways in cerebral malaria-susceptible mice versus cerebral malaria-resistant mice. *BMC Genomics* 8: 452.
77. Bets J, deSchoolmeester ML, Else KJ (2000) *Trichuris muris*: CD4+ T cell-mediated protection in reconstituted SCID mice. *Parasitology* 121 Pt 6: 631–637.
78. Bickle Q, Helmby H (2007) Lack of galectin-3 involvement in murine intestinal nematode and schistosome infection. *Parasite Immunol* 29: 93–100.
79. Cliffe IJ, Humphreys NE, Lane TE, Potten CS, Booth C, et al. (2005) Accelerated intestinal epithelial cell turnover: a new mechanism of parasite expulsion. *Science* 308: 1463–1465.
80. Humphreys NE, Worthington JJ, Little MC, Rice EJ, Grecnis RK (2004) The role of CD8+ cells in the establishment and maintenance of a *Trichuris muris* infection. *Parasite Immunol* 26: 187–196.
81. Villarino AV, Artis D, Bezbradica JS, Miller O, Saris CJ, et al. (2008) IL-27R deficiency delays the onset of colitis and protects from helminth-induced pathology in a model of chronic IBD. *Int Immunol* 20: 739–752.
82. Massacand JC, Stettler RC, Meier R, Humphreys NE, Grecnis RK, et al. (2009) Helminth products bypass the need for TSLP in Th2 immune responses by directly modulating dendritic cell function. *Proc Natl Acad Sci U S A* 106: 13968–13973.
83. Dixon H, Blanchard C, Deschoolmeester ML, Yuill NC, Christie JW, et al. (2006) The role of Th2 cytokines, chemokines and parasite products in eosinophil recruitment to the gastrointestinal mucosa during helminth infection. *Eur J Immunol* 36: 1753–1763.
84. Hepworth MR, Hardman MJ, Grecnis RK (2010) The role of sex hormones in the development of Th2 immunity in a gender-biased model of *Trichuris muris* infection. *Eur J Immunol* 40: 406–416.
85. Hasnain SZ, Thornton DJ, Grecnis RK (2011) Changes in the mucosal barrier during acute and chronic *Trichuris muris* infection. *Parasite Immunol* 33: 45–55.
86. Svensson M, Russell K, Mack M, Else KJ (2010) CD4+ T-cell localization to the large intestinal mucosa during *Trichuris muris* infection is mediated by G alpha i-coupled receptors but is CCR6- and CXCR3-independent. *Immunology* 129: 257–267.
87. Burke ML, McGarvey L, McSorley HJ, Bielefeldt-Ohmann H, McManus DP, et al. (2011) Migrating *Schistosoma japonicum* schistosomula induce an innate immune response and wound healing in the murine lung. *Mol Immunol* 49: 191–200.
88. Zhang M, Gao Y, Du X, Zhang D, Ji M, et al. (2011) Toll-like receptor (TLR) 2 and TLR4 deficiencies exert differential in vivo effects against *Schistosoma japonicum*. *Parasite Immunol* 33: 199–209.
89. Singh KP, Gerard HC, Hudson AP, Boros DL (2006) Differential expression of collagen, MMP, TIMP and fibrogenic-cytokine genes in the granulomatous colon of *Schistosoma mansoni*-infected mice. *Ann Trop Med Parasitol* 100: 611–620.
90. Perry CR, Burke ML, Stenzel DJ, McManus DP, Ramm GA, et al. (2011) Differential expression of chemokine and matrix re-modelling genes is associated with contrasting schistosome-induced hepatopathology in murine models. *PLoS Negl Trop Dis* 5: e1178.
91. de Oliveira Fraga LA, Torrero MN, Tocheva AS, Mitre E, Davies SJ (2010) Induction of type 2 responses by schistosome worms during prepatent infection. *J Infect Dis* 201: 464–472.
92. de la Torre-Escudero E, Valero L, Perez-Sanchez R, Manzano-Roman R, Oleaga A (2012) Proteomic identification of endothelial cell surface proteins isolated from the hepatic portal vein of mice infected with *Schistosoma bovis*. *J Proteomics* 77: 129–143.
93. Bystrom J, Dyer KD, Ting-De Ravin SS, Naumann N, Stephany DA, et al. (2006) Interleukin-5 does not influence differential transcription of transmembrane and soluble isoforms of IL-5R alpha in vivo. *Eur J Haematol* 77: 181–190.
94. Burke ML, McManus DP, Ramm GA, Duke M, Li Y, et al. (2010) Co-ordinated gene expression in the liver and spleen during *Schistosoma japonicum* infection regulates cell migration. *PLoS Negl Trop Dis* 4: e686.
95. Angyalosi G, Neveu R, Wolowczuk I, Delanoye A, Herno J, et al. (2001) HLA class II polymorphism influences onset and severity of pathology in *Schistosoma mansoni*-infected transgenic mice. *Infect Immun* 69: 5874–5882.
96. Ray D, Nelson TA, Fu CL, Patel S, Gong DN, et al. (2012) Transcriptional profiling of the bladder in urogenital schistosomiasis reveals pathways of inflammatory fibrosis and urothelial compromise. *PLoS Negl Trop Dis* 6: e1912.
97. Xu Y, Xie J, Li Y, Yue J, Chen J, et al. (2003) Using a cDNA microarray to study cellular gene expression altered by *Mycobacterium tuberculosis*. *Chin Med J (Engl)* 116: 1070–1073.
98. Volpe E, Cappelli G, Grassi M, Martino A, Serafino A, et al. (2006) Gene expression profiling of human macrophages at late time of infection with *Mycobacterium tuberculosis*. *Immunology* 118: 449–460.
99. Silver RF, Walrath J, Lee H, Jacobson BA, Horton H, et al. (2009) Human alveolar macrophage gene responses to *Mycobacterium tuberculosis* strains H37Ra and H37Rv. *Am J Respir Cell Mol Biol* 40: 491–504.
100. Sharbati J, Lewin A, Kutz-Lohroff B, Kamal E, Einspanier R, et al. (2011) Integrated microRNA-mRNA-analysis of human monocyte derived macrophages upon *Mycobacterium avium* subsp. *hominissuis* infection. *PLoS One* 6: e20258.
101. Ragno S, Romano M, Howell S, Pappin DJ, Jenner PJ, et al. (2001) Changes in gene expression in macrophages infected with *Mycobacterium tuberculosis*: a combined transcriptomic and proteomic approach. *Immunology* 104: 99–108.
102. Orlova MO, Majorov KB, Lyadova IV, Erušanov EB, M'Lan C E, et al. (2006) Constitutive differences in gene expression profiles parallel genetic patterns of susceptibility to tuberculosis in mice. *Infect Immun* 74: 3668–3672.
103. Magee DA, Taraktsoglou M, Killick KE, Nalpas NC, Browne JA, et al. (2012) Global gene expression and systems biology analysis of bovine monocyte-

- derived macrophages in response to in vitro challenge with *Mycobacterium bovis*. *PLoS One* 7: e32034.
104. Maddocks S, Scandurra GM, Nourse C, Bye C, Williams RB, et al. (2009) Gene expression in HIV-1/*Mycobacterium tuberculosis* co-infected macrophages is dominated by *M. tuberculosis*. *Tuberculosis (Edinb)* 89: 285–293.
  105. Keller C, Lauber J, Blumenthal A, Buer J, Ehlers S (2004) Resistance and susceptibility to tuberculosis analysed at the transcriptome level: lessons from mouse macrophages. *Tuberculosis (Edinb)* 84: 144–158.
  106. Beisiegel M, Mollenkopf HJ, Hahnke K, Koch M, Dietrich I, et al. (2009) Combination of host susceptibility and *Mycobacterium tuberculosis* virulence define gene expression profile in the host. *Eur J Immunol* 39: 3369–3384.
  107. Sugimoto CR, Zhang G, Cronin B (2013) Bias in peer review. *J Am Soc Inform Sci Tech* 64: 2–17.
  108. Zingales B, Miles MA, Campbell DA, Tibayrenc M, Macedo AM, et al. (2012) The revised *Trypanosoma cruzi* subspecific nomenclature: rationale, epidemiological relevance and research applications. *Infect Genet Evol* 12: 240–253.
  109. Majiwa PA, Hamers R, Van Meirvenne N, Matthysens G (1986) Evidence for genetic diversity in *Trypanosoma (Nannomonas) congolense*. *Parasitology* 93 (Pt 2): 291–304.
  110. Barrett MP, Burchmore RJ, Stich A, Lazzari JO, Frasch AC, et al. (2003) The trypanosomiasis. *Lancet* 362: 1469–1480.
  111. Capewell P, Clucas C, DeJesus E, Kieft R, Hajduk S, et al. (2013) The TgsGP gene is essential for resistance to human serum in *Trypanosoma brucei gambiense*. *PLoS Pathog* 9: e1003686.
  112. Miles MA, Cedillos RA, Pova AA, de Souza AA, Prata A, et al. (1981) Do radically dissimilar *Trypanosoma cruzi* strains (zymodemes) cause Venezuelan and Brazilian forms of Chagas' disease? *Lancet* 1: 1338–1340.
  113. Saeij JP, Boyle JP, Boothroyd JC (2005) Differences among the three major strains of *Toxoplasma gondii* and their specific interactions with the infected host. *Trends Parasitol* 21: 476–481.
  114. Johnston CE, Bradley JE, Behnke JM, Matthews KR, Else KJ (2005) Isolates of *Trichuris muris* elicit different adaptive immune responses in their murine host. *Parasite Immunol* 27: 69–78.
  115. Zuim NR, Allegretti SM, Linhares AX, Magalhaes LA, Zanotti-Magalhaes EM (2012) A Study of the Granulomatous Responses Induced by Different Strains of *Schistosoma mansoni*. *Interdiscip Perspect Infect Dis* 2012: 953524.
  116. Guilbride DL, Guilbride PD, Gawlinski P (2012) Malaria's deadly secret: a skin stage. *Trends Parasitol* 28: 142–150.
  117. De Lima AR, Navarro MC, Arteaga RY, Contreras VT (2008) Cultivation of *Trypanosoma cruzi* epimastigotes in low glucose axenic media shifts its competence to differentiate at metacyclic trypomastigotes. *Exp Parasitol* 119: 336–342.
  118. Perez Brandan C, Padilla AM, Diosque P, Basombrio MA (2006) *Trypanosoma cruzi*: infectivity modulation of a clone after passages through different hosts. *Exp Parasitol* 114: 89–93.
  119. Shikanai-Yasuda MA, Carvalho NB (2012) Oral transmission of Chagas disease. *Clin Infect Dis* 54: 845–852.
  120. Camandaroba EL, Pinheiro Lima CM, Andrade SG (2002) Oral transmission of Chagas disease: importance of *Trypanosoma cruzi* biotype in the intragastric experimental infection. *Rev Inst Med Trop Sao Paulo* 44: 97–103.
  121. Ramirez JD, Montilla M, Cucunuba ZM, Florez AC, Zambrano P, et al. (2013) Molecular epidemiology of human oral Chagas disease outbreaks in Colombia. *PLoS Negl Trop Dis* 7: e2041.
  122. Johnson AM (1984) Strain-dependent, route of challenge-dependent, murine susceptibility to toxoplasmosis. *Z Parasitenkd* 70: 303–309.
  123. Schuurs AH, Verheul HA (1990) Effects of gender and sex steroids on the immune response. *J Steroid Biochem* 35: 157–172.
  124. Klein SL (2012) Immune cells have sex and so should journal articles. *Endocrinology* 153: 2544–2550.
  125. Roberts CW, Cruickshank SM, Alexander J (1995) Sex-determined resistance to *Toxoplasma gondii* is associated with temporal differences in cytokine production. *Infect Immun* 63: 2549–2555.
  126. Schuster JP, Schaub GA (2001) Experimental Chagas disease: the influence of sex and psychoneuroimmunological factors. *Parasitol Res* 87: 994–1000.
  127. Turay AA, Nwogu GO, Okogun GR, Igwe CU, Adeyeye K, et al. (2005) A comparative study on the susceptibility of male and female albino mice to *Trypanosoma brucei brucei*. *J Vector Borne Dis* 42: 15–20.
  128. Greenblatt HC, Rosenstreich DL (1984) *Trypanosoma rhodesiense* infection in mice: sex dependence of resistance. *Infect Immun* 43: 337–340.
  129. Schuster JP, Schaub GA (2001) *Trypanosoma cruzi*: the development of estrus cycle and parasitemia in female mice maintained with or without male pheromones. *Parasitol Res* 87: 985–993.
  130. Mutayoba BM, Gombe S, Kaaya GP, Waindi EN (1988) Trypanosome-induced ovarian dysfunction. Evidence of higher residual fertility in trypanotolerant small East African goats. *Acta Trop* 45: 225–237.
  131. Giammanco S, Ernandes M, La Guardia M (1997) Effects of environmental lighting and tryptophan devoid diet on the rat vaginal cycle. *Arch Physiol Biochem* 105: 445–449.
  132. Nature (2013) Reporting Checklist For Life Sciences Articles. In: checklist.pdf, editor: Nature Publishing Group.
  133. Maguire E, Gonzalez-Beltran A, Rocca-Serra P, Sansone S BioSharing. <http://biosharing.org/>.
  134. Liberati A, Altman DG, Tetzlaff J, Mulrow C, Gotzsche PC, et al. (2009) The PRISMA statement for reporting systematic reviews and meta-analyses of studies that evaluate health care interventions: explanation and elaboration. *PLoS Med* 6: e1000100.
  135. Lander ES, Linton LM, Birren B, Nusbaum C, Zody MC, et al. (2001) Initial sequencing and analysis of the human genome. *Nature* 409: 860–921.
  136. Venter JC, Adams MD, Myers EW, Li PW, Mural RJ, et al. (2001) The sequence of the human genome. *Science* 291: 1304–1351.
  137. StataCorp. Stata Statistical Software: Release 10. College Station, TX, USA: StataCorp LP.
  138. GraphPad. GraphPad Prism version 4.0 for Windows. La Jolla California USA, [www.graphpad.com](http://www.graphpad.com).
